# Supplementary material
Source: Springer Nature journal article supplement (https://www.springermedizin.de/resource/supplementary/13058_2012_3012_MOESM14_ESM.pdf/9703082)

**A** Human Breast Tumor Samples  
(Bonnetfoi *et al.* 2007)

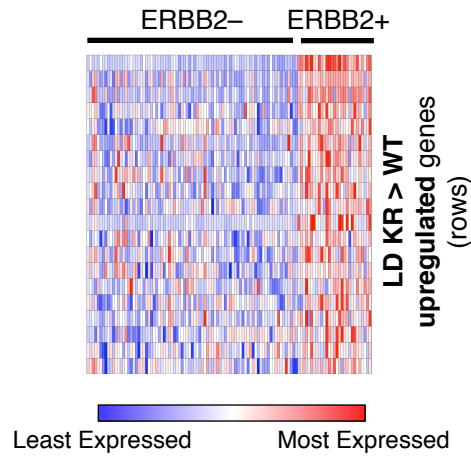

**C** Loi *et al.* (2007) Dataset

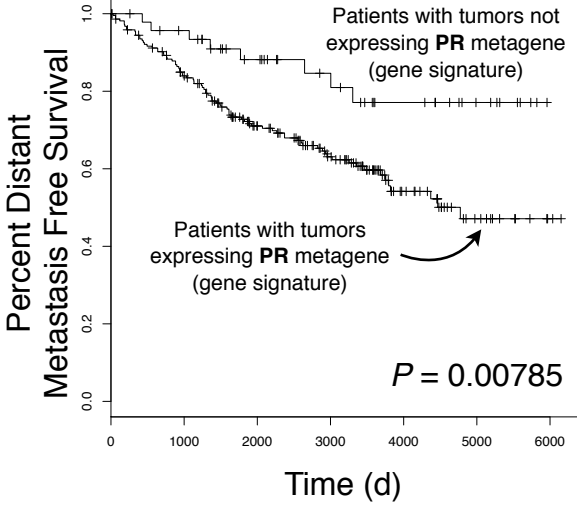

**D** Loi *et al.* (2007) Dataset

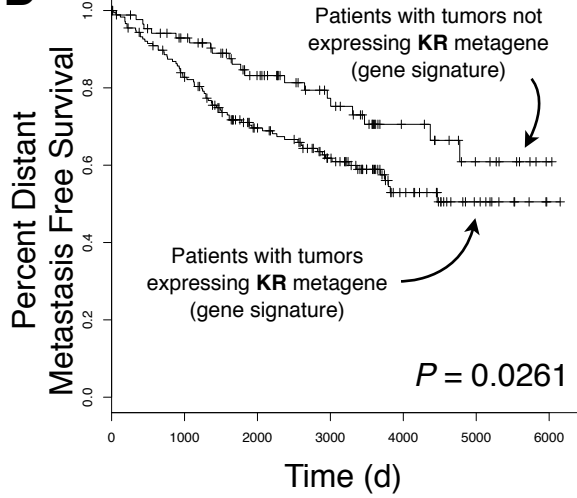

**B**

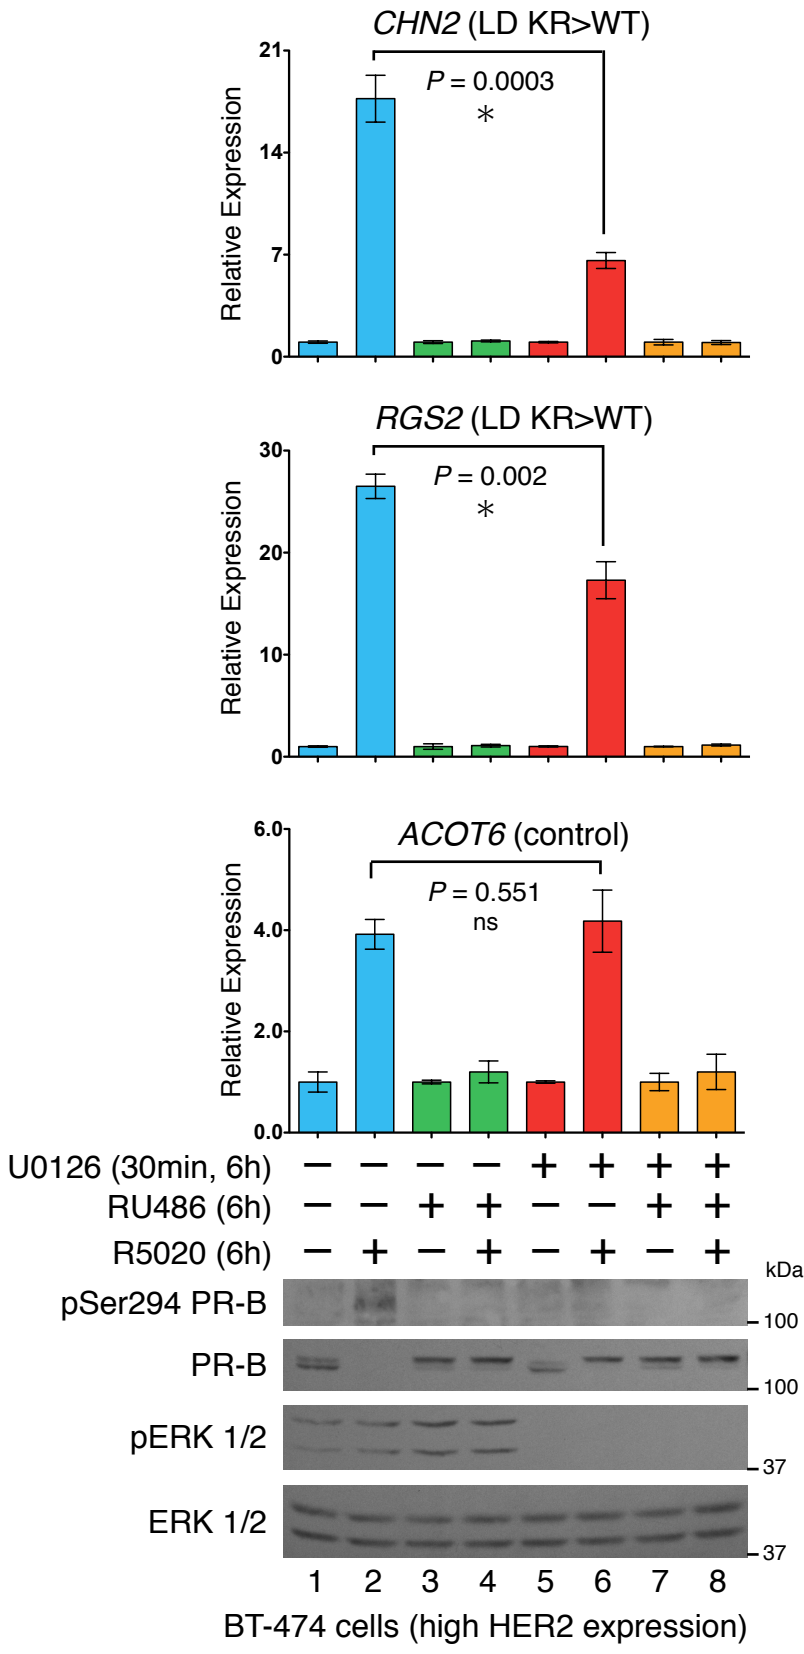

Supplement: MOESM14 [file 9703082]
